# THE AMERICAN PSYCHIATRIC ASSOCIATION

1000 Wilson Blvd., Suite 1825, Arlington, VA 22209-3901  
(888) 357-7924 (toll-free inside the U.S. and Canada) / (703) 907-7300  
web site: [www.psych.org/](http://www.psych.org/) e-mail: [apa@psych.org](mailto:apa@psych.org)

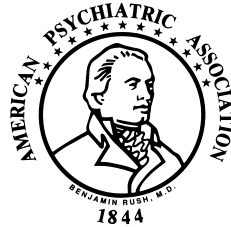

## OFFICERS 2012–2013

|                 |                            |
|-----------------|----------------------------|
| President       | Dilip V. Jeste, M.D.       |
| President-Elect | Jeffrey A. Lieberman, M.D. |
| Treasurer       | David Fassler, M.D.        |
| Secretary       | Roger Peele, M.D.          |

## ASSEMBLY

|               |                        |
|---------------|------------------------|
| Speaker       | R. Scott Benson, M.D.  |
| Speaker-Elect | Melinda L. Young, M.D. |
| Recorder      | Jenny L. Boyer, M.D.   |

## MEDICAL DIRECTOR'S OFFICE

|                          |                            |
|--------------------------|----------------------------|
| Medical Director and CEO | James H. Scully, Jr., M.D. |
|--------------------------|----------------------------|

## BOARD OF TRUSTEES

|                          |                            |
|--------------------------|----------------------------|
| Jeffrey Akaka, M.D.      | Judith F. Kashtan, M.D.    |
| Carol A. Bernstein, M.D. | Molly K. McVoy, M.D.       |
| Brian Crowley, M.D.      | James E. Ninninger, M.D.   |
| Jeffrey Geller, M.D.     | John M. Oldham, M.D.       |
| Marc David Graff, M.D.   | Alan F. Schatzberg, M.D.   |
| James A. Greene, M.D.    | Alik S. Widge, M.D., Ph.D. |

## PUBLISHER

Rebecca D. Rinehart

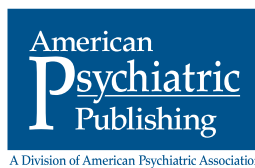

The American Journal of Psychiatry is online at [ajp.psychiatryonline.org](http://ajp.psychiatryonline.org)

THE AMERICAN PSYCHIATRIC ASSOCIATION  
Chairpersons of Councils, Commissions, Committees, and Task Forces

Standing Committees

**Bylaws**

Eric M. Plakun, M.D.

**Elections**

Robert E. Kelly, Jr., M.D.

**Ethics**

Richard D. Milone, M.D.

**Finance and Budget**

Frank W. Brown, M.D.

*Audit*

David Fassler, M.D.

*Investment Oversight*

Larry R. Faulkner, M.D.

**Joint Reference**

Jeffrey A. Lieberman, M.D.

**Membership**

Joseph Ezra V. Rubin, M.D.

**Nominating**

John M. Oldham, M.D.

**Tellers**

Tanya Nayyirah Alim, M.D.

**Council on Addiction Psychiatry**

John A. Renner, M.D.

**Council on Advocacy and Government Relations**

Robert Paul Cabaj, M.D.

*Advocacy and Litigation Funding*

Renee L. Binder, M.D.

**Council on Children, Adolescents, and Their Families**

Louis J. Kraus, M.D.

*Agnes Purcell McGavin Award*

*Blanche F. Ittleson Research Award*

Karen Dineen Wagner, M.D.

**Council on Communications**

Jeffrey A. Borenstein, M.D.

**Council on Geriatric Psychiatry**

Brent P. Forester, M.D.

**Council on Healthcare Systems and Financing**

Sul Ross Olen Thorward, M.D.

*Reimbursement for Psychiatric Care*

Bruce J. Schwartz, M.D.

*RBRVS, Codes and Reimbursement*

Ronald M. Burd, M.D.

**Council on Medical Education and Lifelong Learning**

Sandra Sexson, M.D.

*APA Public Psychiatry Fellowship Selection Committee*

Stephen M. Goldfinger, M.D.

*APA/SAMHSA Minority Fellowship Selection and Advisory*

Toi B. Harris, M.D.

*Scientific Program*

Joseph A. Cheong, M.D.

*Scientific Program Committee of the Institute on Psychiatric Services*

David Alan Pollack, M.D.

*Task Force to Update the Ethics Annotations*

Laura W. Roberts, M.D.

*Vestermark Award Committee*

Frederick G. Guggenheim, M.D.

**Council on Minority Health and Health Disparities**

Sandra C. Walker, M.D.

**Council on Psychiatry And Law**

Patricia R. Recupero, M.D., J.D.

*Isaac Ray/Human Rights Award*

Steven K. Hoge, M.D.

*Judicial Action*

Paul S. Appelbaum, M.D.

*Manfred S. Guttmacher Award*

Rebecca W. Brendel, M.D., J.D.

**Council on Psychosomatic Medicine  
(Consultation Liaison Psychiatry)**

Joel E. Dimsdale, M.D.

**Council on Research and Quality Care**

Joel Yager, M.D.

*Electronic Health Records*

Steven Roy Daviss, M.D.

*Psychiatric Dimensions of Disasters*

Robert J. Ursano, M.D.

*Research Awards*

Lewis L. Judd, M.D.

*Steering Committee on Practice Guidelines*

Joel Yager, M.D.

*Task Force on DSM-V*

David J. Kupfer, M.D.

*Task Force to Revise the Practice of Electroconvulsive Therapy*

Sarah H. Lisanby, M.D.

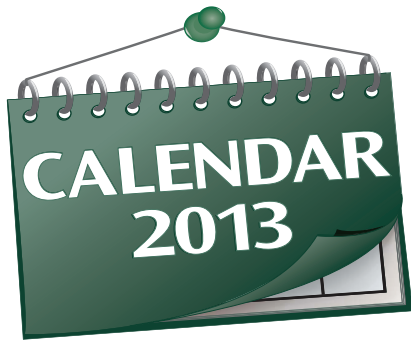

*For free listing of your organization's official annual or regional meeting, please send us the following information: sponsor, location, inclusive dates, type and number of continuing education credits (if available), and the name, address, and telephone number of the person or group to contact for more information. In order for an event to appear in our listing, all notices and changes must be received at least 6 months in advance of the meeting and should be addressed to:*

*Calendar, American Journal of Psychiatry, 1000 Wilson Boulevard, Suite 1825, Arlington, VA 22209-3901, [swestrade@psych.org](mailto:swestrade@psych.org) (e-mail).*

*Because of space limitations, only listings of meetings of the greatest interest to Journal readers may be included.*

---

## APRIL

**April 3–6**, 24th Annual Meeting, American Neuropsychiatric Association, Boston, Mass. Contact: American Neuropsychiatric Association, 700 Ackerman Rd., Suite 625, Columbus, OH 43202; (614) 447-2077 (tel); e-mail: [anpa@osu.edu](mailto:anpa@osu.edu); [www.anpaonline.org](http://www.anpaonline.org) (web site).

---

## MAY

**May 18–22**, 166th Annual Meeting, American Psychiatric Association, San Francisco, Calif. Contact: APA Annual Meetings Dept., 1000 Wilson Blvd, Suite 1825, Arlington, VA 22209; (703) 907-7815 (tel); <http://www.psych.org/learn/annual-meeting> (web site).

---

## JUNE

**June 6–9**, 4th World Congress on ADHD: From Childhood to Adult Dis-

ease, Milan, Italy. Contact Congress Organizer, +49-40-670 88 20 (tel); [adhd2013@cpo-hanser.de](mailto:adhd2013@cpo-hanser.de) (email); [www.adhd-congress.org](http://www.adhd-congress.org) (web site).

**June 20–22**, Association of Directors of Medical Student Education in Psychiatry meeting, Williamsburg Lodge, Williamsburg, Va. For registration information, go to [http://www.admsep.org/upcoming\\_meeting.php](http://www.admsep.org/upcoming_meeting.php).

---

## JULY

**July 8–13**, 28th International Congress of Applied Psychology, Palais des Congrès de Paris, France. Contact: [exh@icap2014.com](mailto:exh@icap2014.com) (email); [www.icap2014.com](http://www.icap2014.com) (web site).

---

## SEPTEMBER

**September 25–27**, 9th Congress of the International Neuropsychiatric Association, Chicago, Ill. [www.inawebsite.org](http://www.inawebsite.org) (web site).

---

## OCTOBER

**October 10–13**, 65th Institute on Psychiatric Services, Philadelphia, Pa. Contact: APA Annual Meetings Dept., 1000 Wilson Blvd, Suite 1825, Arlington, VA 22209; <http://www.psychiatry.org/learn/institute-on-psychiatric-services> (web site).

**October 17–21**, XXI World Congress of Psychiatric Genetics, Boston, Mass. Contact congress organizer: Parthenon Management Group, 5034A Thoroughbred Lane, Brentwood, TN 37027; (615) 324-2365 (tel); [info@parthenonmanagementgroup.com](mailto:info@parthenonmanagementgroup.com) (email); [www.wcpg2013.org](http://www.wcpg2013.org) (web site).

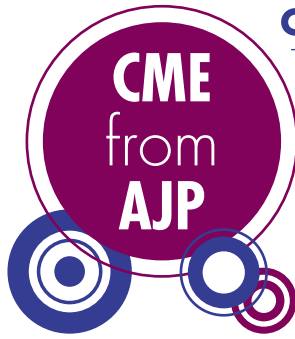

## Continuing Medical Education

Three articles in this issue form the basis of a short course with questions that can be answered for up to 1 *AMA PRA Category 1 Credit*<sup>™</sup> each by visiting <http://psychiatryonline.org/cme.aspx> and clicking on the “American Journal of Psychiatry” tab.

CME credit is issued only online, and a paid subscription to the AJP CME course program is required.

This month’s courses appear on pages 449–452.

FREE AUDIO!

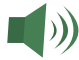

### Have You Heard?

You can listen to highlights of *The American Journal of Psychiatry* by downloading a monthly free .mp3 audio file from our web site (<http://ajp.psychiatryonline.org/audio.aspx#>) or by subscribing to the AJP Audio podcast at iTunes or other feed reader. Presented by Deputy Editor Dr. Susan Schultz or by Executive Editor Michael Roy, each month’s audio lasts approximately 30 minutes and covers several research articles, the Treatment in Psychiatry feature, and one or two editorials.

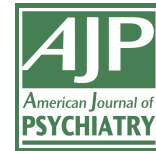

Coming in the May 2013 issue\*

## THE AMERICAN JOURNAL OF PSYCHIATRY

### Does Fetal Exposure to SSRIs or Maternal Depression Impact Infant Growth?

K.L. Wisner, D.L. Bogen, D. Sit, M. McShea, C. Hughes, D. Rizzo, A. Confer,  
J. Luther, H. Eng, and S.W. Wisniewski

### Effects of News Media Messages About Mass Shootings on Attitudes Toward Persons With Serious Mental Illness and Public Support for Gun Control Policies

E.E. McGinty, D.W. Webster, and C.L. Barry

### Prevalence and Correlates of Prolonged Fatigue in a U.S. Sample of Adolescents

F. Lamers, I. Hickie, and K.R. Merikangas

### Genome-Wide Methylation Changes in the Brains of Suicide Completers

B. Labonté, M. Suderman, G. Maussion, J.P. Lopez, L. Navarro-Sánchez, V. Yerko,  
N. Mechawar, M. Szyf, M.J. Meaney, and G. Turecki

\*Can’t wait? Visit [ajp.psychiatryonline.org/AJPinAdvance.aspx](http://ajp.psychiatryonline.org/AJPinAdvance.aspx) to see all articles uploaded in advance of print!

# The Residents' JOURNAL

## The Residents' JOURNAL

a publication of  
The American Journal of Psychiatry

February 2013

Volume 8

Issue 2

### Inside

- 2 **Transitions to Chief Resident: A Developmental Perspective**  
Sourav Sengupta, M.D., M.P.H.
- 4 **The Role of the Cerebellum in Bipolar Disorder and Other Psychiatric Illnesses**  
Maria Andrea Baez, M.D., Jonathan Avery, M.D.
- 6 **The Unknown Efficiency Benefits of Electronic Medical Records in Outpatient Psychiatry Documentation**  
Daniel Bristow, M.D.
- 7 **Bromo-DragonFLY-Induced Dystonia**  
Gayle Pletsch, M.D., Christopher Rodgman, M.D.
- 9 **Video Game Addiction as a Form of Avoidance in a 61-Year Old Woman: A Common Problem in an Unlikely Subject**  
Diane L. Lewis, M.D.
- 11 **Not So Loose Associations**  
Alan Hsu, M.D.
- 12 **Test Your Knowledge**
- 13 **Author Information and Upcoming Issue Themes**

### In This Issue

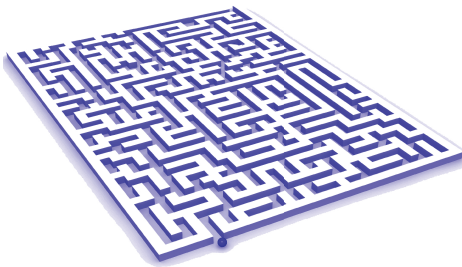

This issue of the *Residents' Journal* highlights a variety of topics. First, Sourav Sengupta, M.D., M.P.H., shares his own experience as a chief resident and outlines the transitions that accompany this responsibility. Maria Andrea Baez, M.D., and Jonathan Avery, M.D., discuss the role of the cerebellum in bipolar disorder as well as in other psychiatric disorders. Daniel Bristow, M.D., discusses the use of electronic medical records in outpatient psychiatry and the need for further study of outpatient efficiency using this technology. Gayle Pletsch, M.D., and Christopher Rodgman, M.D., describe a case of Bromo-DragonFLY-induced dystonia in a young woman with a history of bipolar disorder. Diane L. Lewis, M.D., presents a unique case report of a 61-year-old woman with a video game addiction. Lastly, Alan Hsu, M.D., contributes a perspective on the "Mind Games" competition at last year's APA annual meeting, of which he was a participant.

Editor-in-Chief  
Monifa Seawell, M.D.  
Senior Editor  
Sarah M. Fayad, M.D.  
Associate Editor  
Arshya Vahabzadeh, M.D.

Editors Emeriti  
Sarah B. Johnson, M.D.  
Molly McVoy, M.D.  
Joseph M. Cerimele, M.D.  
Staff Editor  
Angela Moore

*The Residents' Journal* accepts manuscripts authored by medical students, resident physicians, and fellows. To submit your paper, please visit the manuscript submission site at [mc.manuscriptcentral.com/appi-ajp](http://mc.manuscriptcentral.com/appi-ajp) and either create an account or use your existing account. For manuscript type, select "Residents." Then follow the instructions to upload your manuscript. Residents who are interested in participating as Guest Section Editors should e-mail *The Residents' Journal* Editor-in-Chief Monifa Seawell at [mseawell@med.wayne.edu](mailto:mseawell@med.wayne.edu).

*The Residents' Journal* is sent free-of-charge to all psychiatry residents. Anyone interested in being included on the distribution list should contact Angela Moore, *The Residents' Journal* staff editor at [ajp@psych.org](mailto:ajp@psych.org) with "Subscribe to Residents' Journal" in the subject line.

To access the complete Residents' Journal archives, visit [ajp.psychiatryonline.org/residents\\_journal.aspx](http://ajp.psychiatryonline.org/residents_journal.aspx)

# The American Journal of PSYCHIATRY

4 of Journal Watch  
Psychiatry's  
10 "Top Stories of 2012"  
appeared in AJP!  
No other journal had  
multiple appearances!

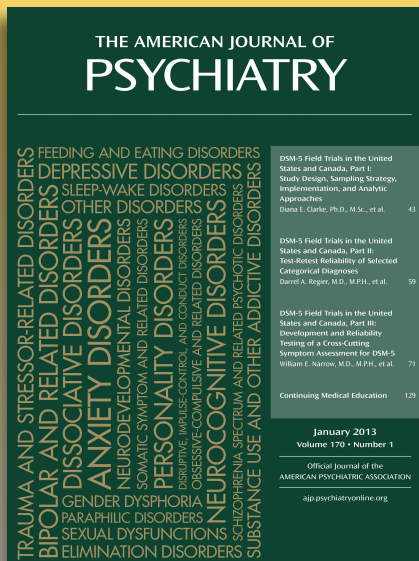

Official Journal of the  
American Psychiatric Association

Edited by Robert Freedman, M.D.

- *The American Journal of Psychiatry* (AJP) has an Impact Factor of 12.539 according to the 2011 Journal Citation Reports® (Thomson Reuters, 2012), placing it 2nd among the 129 journals in psychiatry while still remaining the far-and-away leader in total citations.
- *The American Journal of Psychiatry* is also the #2 journal in psychiatry in terms of immediacy according to Thomson Scientific's Immediacy Index. This important performance metric is calculated by dividing the number of citations to articles published in a given year by the number of articles published in that year.
- A poll conducted by the BioMedical & Life Sciences Division of The Special Libraries Association identified the 100 most influential journals in all of Biology & Medicine over the last 100 years. *The American Journal of Psychiatry* was among those honored, the only psychiatry/psychology journal represented.

No other psychiatric journal reaches more psychiatrists with greater impact or immediacy than the one the overwhelming majority of psychiatrists considers essential: AJP.

**Latest  
IMPACT FACTOR 12.539!**

ISSN 0002-953X • [ajp.psychiatryonline.org](http://ajp.psychiatryonline.org)  
To order a subscription, visit [www.appi.org](http://www.appi.org).

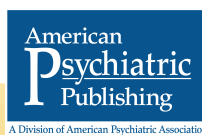

The *First* and *Last* Word in Psychiatry  
[www.appi.org](http://www.appi.org) • 1-800-368-5777 • 703-907-7322

Priority Code AH1303

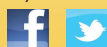

## Contents

- A9 Editorial Board  
A11 Highlights of this issue

### Editorials

- 163 **Recruitment into psychiatry: quantitative myths and qualitative challenges**  
T. Davies

- 165 **The First Shift – poem**  
Victoria Cole

- 166 **Biological psychiatry: time for new paradigms**  
D. Linden

- 168 **Early intervention for psychosis in low- and middle-income countries needs a public health approach**  
S. Farooq

- 170 **Pros and cons of specialised care in bipolar disorder: an international perspective**  
E. Vieta

- 171 **Bereavement – in 100 words**  
Colin Murray Parkes

### Special article

- 172 **Bipolar disorder and substance misuse: pathological and therapeutic implications of their comorbidity and cross-sensitisation**  
R. M. Post and P. Kalivas

### Review articles

- 177 **Affective disorders and risk of developing dementia: systematic review**  
J. da Silva, M. Gonçalves-Pereira, M. Xavier and E. B. Mukaetova-Ladinska

- 186 **Gambling – in 100 words**  
Sanju George

- 187 **Transitional interventions to reduce early psychiatric readmissions in adults: systematic review**  
S. N. Vigod, P. A. Kurdyak, C.-L. Dennis, T. Leszcz, V. H. Taylor, D. M. Blumberger and D. P. Seitz

- 194 **Back Ward at Glenside – poems by doctors**  
Charles Montgomery

### Papers

- 195 **Country- and individual-level socioeconomic determinants of depression: multilevel cross-national comparison**  
D. Rai, P. Zitko, K. Jones, J. Lynch and R. Araya

- 204 **Behavioural activation v. antidepressant medication for treating depression in Iran: randomised trial**  
L. Moradveisi, M. J. H. Huibers, F. Renner, M. Arasteh and A. Arntz

- 212 **Treatment in a specialised out-patient mood disorder clinic v. standard out-patient treatment in the early course of bipolar disorder: randomised clinical trial**  
L. V. Kessing, H. V. Hansen, A. Hvenegaard, E. M. Christensen, H. Dam, C. Gluud, J. Wetterslev and The Early Intervention Affective Disorders (EIA) Trial Group

- 220 **Cost-effectiveness of an Improving Access to Psychological Therapies service**  
C. Mukuria, J. Brazier, M. Barkham, J. Connell, G. Hardy, R. Hutten, D. Saxon, K. Dent-Brown and G. Parry

- 228 **Choice and rejection of psychiatry as a career: surveys of UK medical graduates from 1974 to 2009**  
M. J. Goldacre, S. Fazel, F. Smith and T. Lambert

### Short report

- 235 **Personalised intervention for people with depression and severe COPD**  
G. S. Alexopoulos, D. N. Kiosses, J. A. Sirey, D. Kanellopoulos, R. S. Novitch, S. Ghosh, J. K. Seirup and P. J. Raue

### Columns

- 237 **Correspondence**  
239 **Book reviews**  
240 **Contents of *Advances in Psychiatric Treatment***  
241 **Contents of the *American Journal of Psychiatry***  
242 **From the Editor's desk**

### Cover picture

*Marlene Dietrich with Skull* (gouache on paper, 1975) by Stanley Lench (1934–2000)

Marlene Dietrich was at the peak of her film career between the 1920s and 1950s. She was well known for retaining her beauty through the use of wigs and cosmetics, and Lench reflects this in the over-emphasis of the actress' facial features, hairstyle and long painted fingernails. The skull on the left undermines the preservation of youth by acting as a *memento mori* – a reminder of mortality.

Lench's bold and colourful work often depicts his childhood fascination with popular icons and stars of the silver screen. He experienced prolonged bouts of mental illness throughout his life, which on occasion forced him into a reclusive existence. Lench explained that he became an artist to 'cheat death and time'. This statement reflects the themes of Lench's work, but also highlights his ultimate goal: to be recognised and remembered for his art.

We are always looking for interesting and visually appealing images for the cover of the *Journal* and would welcome suggestions or pictures, which should be sent to Dr Allan Beveridge, British Journal of Psychiatry, 17 Belgrave Square, London SW1X 8PG, UK or [bjp@rcpsych.ac.uk](mailto:bjp@rcpsych.ac.uk).

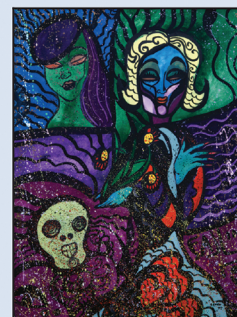

Source: http://ajp.psychiatryonline.org/doi/suppl/10.1176/ajp.2013.170.issue-4/suppl_file/front.pdf
