# THE AMERICAN JOURNAL OF PSYCHIATRY

---

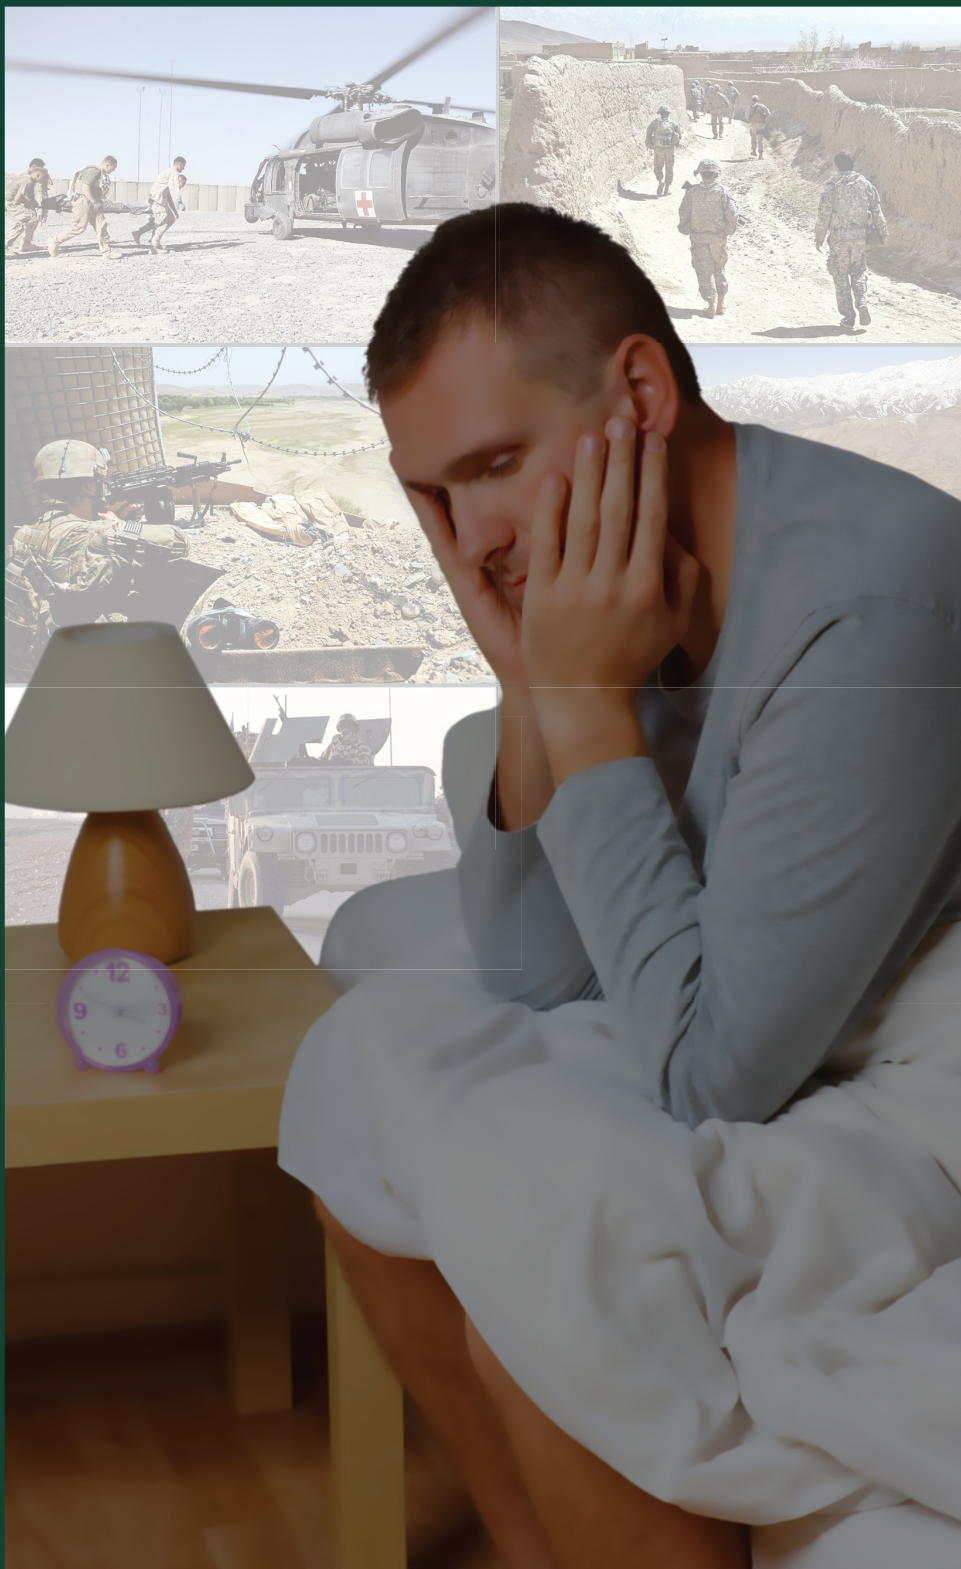

- ◀ **Sleep Disturbances as the Hallmark of PTSD: Where Are We Now?**  
Anne Germain, Ph.D. 372
- ◀ **Risk for Addiction-Related Disorders Following Mild Traumatic Brain Injury in a Large Cohort of Active-Duty U.S. Airmen**  
Shannon C. Miller, M.D., et al. 383
- Deviance in Fetal Growth and Risk of Autism Spectrum Disorder**  
Kathryn M. Abel, M.D., Ph.D., et al. 391
- Effect of a Nicotine Vaccine on Nicotine Binding to  $\beta_2^*$ -Nicotinic Acetylcholine Receptors In Vivo**  
Irina Esterlis, Ph.D., et al. 399
- Continuing Medical Education** 449

**April 2013**

**Volume 170 • Number 4**

---

Official Journal of the  
AMERICAN PSYCHIATRIC ASSOCIATION

---

[ajp.psychiatryonline.org](http://ajp.psychiatryonline.org)
