# THE AMERICAN JOURNAL OF PSYCHIATRY

## En este número

A28

### Perspectivas

#### Editoriales

- 351 **Cuando la adicción co-ocurre con lesión cerebral traumática**  
John D. Corrigan, Rachel Sayko Adams, y Mary Jo Larson **Audio**
- 355 **Ambientes fetales y socioculturales y autismo**  
Catherine Lord
- 359 **Reducción de la unión a los receptores nicotínicos después de la vacuna para la nicotina: ¿es el efecto lo suficientemente grande para ser clínicamente significativo?**  
Karl Fagerström y Serena Tonstad
- 362 **¿Deben ser las intervenciones de salud cultivadas localmente o producidas en factorías?**  
Gregory E. Simon y Evette J. Ludman

#### Conferencia de Caso Clínico

- 366 **Monitoreo de glóbulos blancos durante el tratamiento a largo plazo con clozapina**  
Dan Cohen y Marcel Monden  
**Audio Guías clínicas**

#### Imágenes en Psiquiatría

- 370 **Anorexia Mirabilis: La práctica del ayuno de Santa Catalina de Siena en la baja Edad Media**  
Fernando Espi Forcen

#### Resúmenes y Reseñas

- 372 **Trastornos del sueño como síntoma distintivo del TEPT: ¿dónde estamos?**  
Anne Germain **Audio EMC Guías clínicas**

### Nuevas investigaciones

#### Artículos

- 383 **Riesgo de trastornos relacionados con las adicciones después de lesión cerebral traumática leve en una cohorte grande de aviadores estadounidenses en servicio activo**  
Shannon C. Miller, Suzanne H. Baktash, Timothy S. Webb, Casserly R. Whitehead, Charles Maynard, Timothy S. Wells, Clifford N. Otte, y Russel K. Gore **Audio Editorial**

- 391 **Desvío del crecimiento fetal y riesgo de trastorno del espectro autista**  
Kathryn M. Abel, Christina Dalman, Anna C. Svensson, Ezra Susser, Henrik Dal, Selma Idring, Roger T. Webb, Dheeraj Rai, y Cecilia Magnusson  
**Editorial**
- 399 **Efecto de una vacuna para la nicotina en la unión de la nicotina a los receptores nicotínicos de la acetilcolina  $\beta_2^*$  in vivo en fumadores de tabaco**  
Irina Esterlis, Jonas O. Hannestad, Evgenia Perkins, Frederic Bois, D. Cyril D'Souza, Rachel F. Tyndale, John P. Seibyl, Dorothy M. Hatsukami, Kelly P. Cosgrove, y Stephanie S. O'Malley **Audio Editorial EMC**
- 408 **Inicio temprano del hábito de fumar y riesgo de subsiguiente dependencia de la nicotina: un estudio en gemelos monozigóticos**  
Kenneth S. Kendler, John Myers, M. Imad Damaj, y Xianging Chen
- 414 **Atención colaborativa basada en la consulta vs. atención colaborativa basada en la telemedicina para la depresión en centros rurales de salud certificados por el gobierno federal: un ensayo de eficacia pragmático, comparativo y aleatorizado**  
John C. Fortney, Jeffrey M. Pyne, Sip B. Mouden, Dinesh Mittal, Teresa J. Hudson, Gary W. Schroeder, David K. Williams, Carol A. Bynum, Rhonda Mattox, y Kathryn M. Rost **Audio Editorial EMC**
- 426 **Efectos del hipogonadismo inducido farmacológicamente sobre el ánimo y el comportamiento en mujeres jóvenes sanas**  
Rivka Ben Dor, Veronica L. Harsh, Paige Fortinsky, Deloris E. Koziol, David R. Rubinow, y Peter J. Schmidt **Audio**
- 434 **Asociación entre el estilo cognitivo maternal depresogénico durante el embarazo y el estilo cognitivo de los hijos 18 años después**  
Rebecca M. Pearson, Charles Fernyhough, Richard Bentall, Jonathan Evans, Jon Heron, Carol Joinson, Alan L. Stein, y Glyn Lewis

### Comunicados y actualizaciones

#### Cartas al Editor

- 442 **Los ensayos de campo del DSM-5 y la confiabilidad del trastorno de consumo de alcohol**  
Definiendo la enfermedad psiquiátrica  
Comentario sobre la aplicación de los criterios del DSM-5 para el trastorno de espectro autista

Curso del tratamiento con terapia antidepresiva en la depresión tardía

Variación de genes de receptores adrenérgicos e inhibidores selectivos de la recaptación de norepinefrina

448 Libros Recibidos

### Otros temas de interés

449 Educación Médica Continuada

A12 Directivos de la American Psychiatric Association

A22 Calendario

A26 Contenidos del *British Journal of Psychiatry*

A27 Contenidos del *Shanghai Archives of Psychiatry*

### Cubierta

Diseño de la cubierta de Susan Westrate.

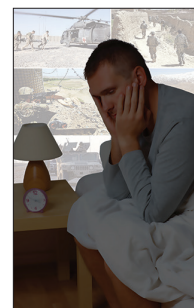

#### Audio

artículo en AJP Audio: archivo .mp3 descargable de [ajp.psychiatryonline.org](http://ajp.psychiatryonline.org)

#### Guías clínicas

este artículo ofrece guías clínicas (ver página "En este Número" o al final del artículo)

#### EMC

existe un curso en línea que cubre los contenidos de este artículo para los suscriptores del programa de cursos de EMC del AJP

#### Editorial

este artículo se discute en uno de los editoriales de este número

This issue's Spanish Table of Contents is presented in collaboration with the Office of Global Health, UMDNJ-Robert Wood Johnson Medical School

Translation courtesy of  
Sergi Casals, M.S.

*Garuna Editors (www.garunaeditors.com), Barcelona, Spain*

Carlos Lopez Jaramillo, M.D.  
*Universidad de Antioquia, Medellin, Colombia*

and

Javier I. Escobar, M.D., M.Sc.  
*UMDNJ-Robert Wood Johnson Medical School*
